# Supplementary material
Source: Royal Society of Chemistry journal article supplement (doi:10.1039/d6dt00769d)
Supplement: d6dt00769d1.pdf [file d6dt00769d1.pdf]

Supplementary Information

**Construct mesoporous MXenes by thermal shock induced pore engineering for high performance supercapacitor**

Xiaolong Lu,<sup>a,b</sup> Cancan Li,<sup>a</sup> Ziyi Chen,<sup>a</sup> Ben Zhou,<sup>a,c</sup> Can Tu,<sup>a</sup> Bijun Fang,<sup>a</sup> Ningyi Yuan,<sup>\*a</sup> Chao Huangfu<sup>\*c</sup>

- a School of Materials Science and Engineering, Jiangsu Collaborative Innovation Center for Photovoltaic Science and Engineering, Changzhou University, Changzhou, 213164, China. Email: nyyuan@cczu.edu.cn
- b Key Laboratory of Multi-spectral Absorbing Materials and Structures, Ministry of Education, University of Electronic Science and Technology of China, Chengdu, 611731, China.
- c Collage of Automotive Engineering, Changzhou Institute of Technology, Changzhou, 213032, China. Email: huangfc@czu.cn.

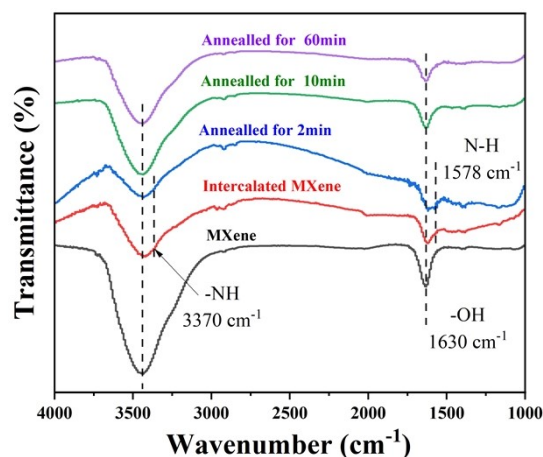

Fig. S1 FTIR spectra of multilayer MXene, intercalated MXene and annealed MXene samples.

To affirm the interaction between n-butylamine and MXenes, Fourier transform infrared spectroscopy (FTIR) detection was performed. And then, during rapid annealing, to optimize the time of annealing and check the possible structure evolution, various times of 2, 10, 60 min were adopted. It is observed that when the annealing duration is maintained at 2 min, residual n-butylamine molecules remained within the MXene interlayers. However, for annealing times extended to 10 and 60 minutes, no detectable N-H vibrational signal is observed in the spectroscopic analysis, while the characteristic -OH peak shifts back to  $1630\text{ cm}^{-1}$ , indicating the complete elimination of n-butylamine.

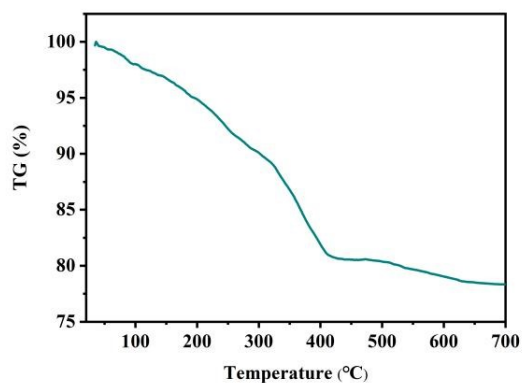

Fig. S2 The TG curve of intercalated MXenes.

The boiling point of  $\text{C}_4\text{H}_{11}\text{N}$  is about  $78\text{ }^\circ\text{C}$ . Obvious weight loss under  $450\text{ }^\circ\text{C}$  could be found and are ascribed to the evaporation and pyrolysis of intercalated  $\text{C}_4\text{H}_{11}\text{N}$  and surface functional groups of MXenes. To guarantee the remove of  $\text{C}_4\text{H}_{11}\text{N}$ , the annealing temperature was set at  $500\text{ }^\circ\text{C}$ .

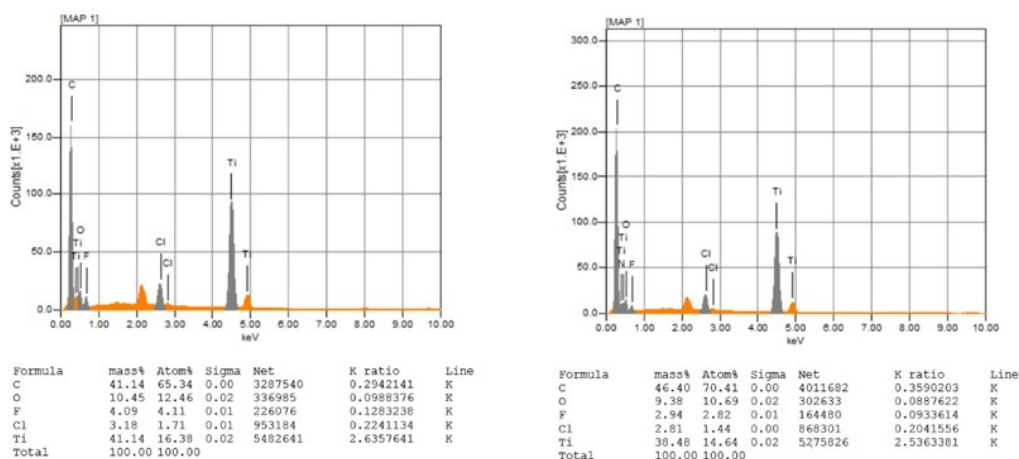

Fig. S3 EDS element analysis of multilayer MXenes (left) and annealed MXenes (right). The existence and decrease of F, O and Cl elements confirm, to a certain degree, the partial remove and residual of surface functional groups after rapid annealing, although the EDS analysis is non-quantitative.

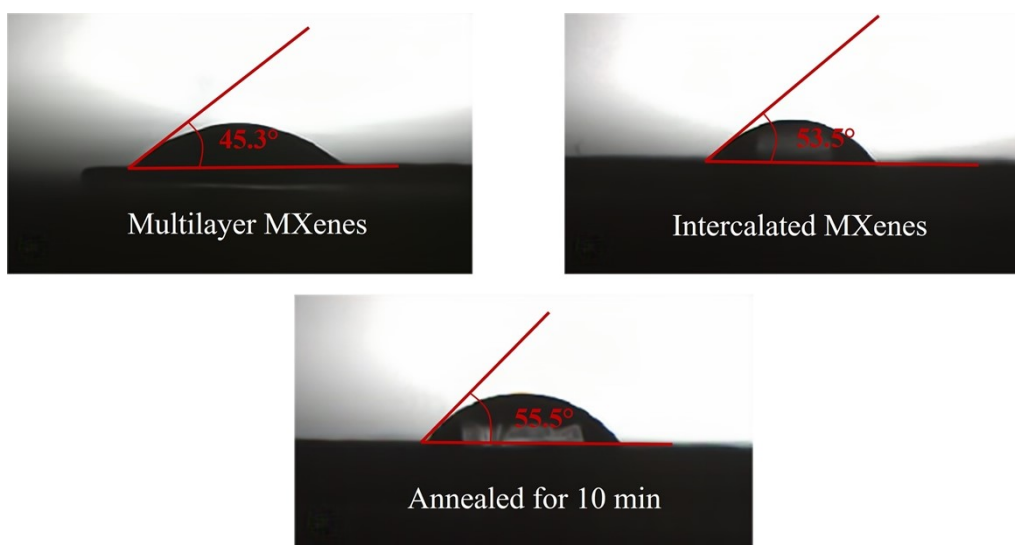

Fig. S4 The contact angle tests of the powders of multilayer MXenes, intercalated MXenes and annealed MXenes for 10 min.

The contact angle tests of the powders of multilayer MXene, intercalated MXene and annealed MXene for 10 min were conducted. It can be observed that multilayer MXenes show hydrophilicity due to their surface functional groups. After intercalation, the contact angle between the MXenes and the water droplets increased from  $45.3^\circ$  to  $53.5^\circ$ , indicating a slight decrease for the hydrophilicity. This can be attributed to the hydrophilic end  $-NH_2$  of n-butylamine forming hydrogen bonds with the functional

groups of MXenes as showed in FTIR spectroscopy, while the hydrophobic end  $-C_4H_9$  covers the surface of MXenes.<sup>1</sup> After rapid annealing for 10 min, the intercalated n-butylamine is sublimated and pyrolyzed due to thermal shock, and partial functional groups are removed. The annealed MXenes still show hydrophilicity, although the contact angle gets increased. This could be derived from the residual functional groups because of the short treatment process of rapid annealing and open-up framework of annealed MXenes due to the microexplosion effect (Fig. 2f). The hydrophilic annealed MXenes are advantageous for further exfoliation and preparation of M-MXenes.

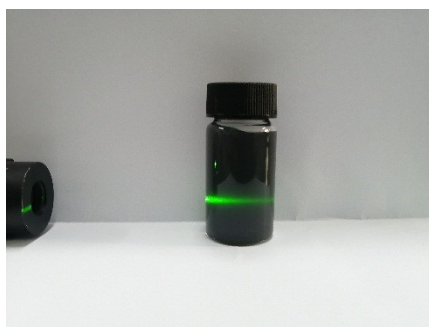

Fig. S5 The optical image showing the Tyndall effect of dispersed M-MXene nanosheets.

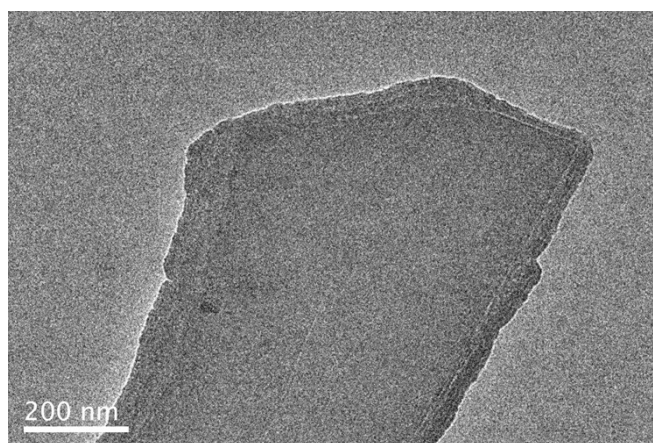

Fig. S6 TEM images of obtained D-MXene nanosheets.

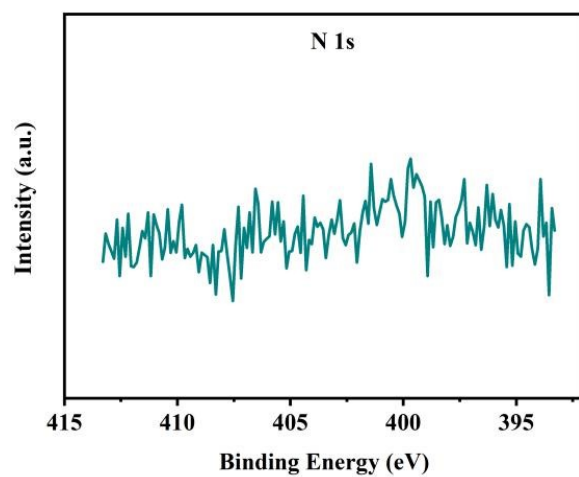

Fig. S7 XPS spectrum of N element in annealed MXenes.

Table. S1 Detailed XPS peak fitting results of Ti and O spectra.

Rapid annealed sample:

| Region           | BE (eV)     | Fraction (%) | Assigned to |
|------------------|-------------|--------------|-------------|
| Ti 2P3/2 (2p1/2) | 454.5/460.3 | 23.5         | Ti-C        |
|                  | 455.2/460.8 | 24.6         | Ti (II)     |
|                  | 456.3/462   | 32.4         | Ti (III)    |
|                  | 458.3/464   | 11.9         | Ti-O        |
|                  | 459/465.1   | 7.6          | Ti-F        |

| Region | BE (eV) | Fraction (%) | Assigned to            |
|--------|---------|--------------|------------------------|
| O 1s   | 530.4   | 32.01        | TiO <sub>2</sub>       |
|        | 531.2   | 21.35        | C-Ti-O <sub>x</sub>    |
|        | 533.0   | 41.26        | C-Ti-(OH) <sub>x</sub> |
|        | 534.8   | 5.38         | H <sub>2</sub> O       |

Unannealed sample:

| Region           | BE (eV)     | Fraction (%) | Assigned to |
|------------------|-------------|--------------|-------------|
| Ti 2P3/2 (2p1/2) | 454.5/460.3 | 27.2         | Ti-C        |
|                  | 455.2/460.8 | 24.2         | Ti (II)     |
|                  | 456.3/462   | 33.2         | Ti (III)    |
|                  | 458.1/464   | 6.5          | Ti-O        |
|                  | 458.7/465.1 | 8.9          | Ti-F        |

| Region | BE (eV) | Fraction (%) | Assigned to            |
|--------|---------|--------------|------------------------|
| O 1s   | 530.3   | 13.64        | TiO <sub>2</sub>       |
|        | 531.2   | 8.32         | C-Ti-O <sub>x</sub>    |
|        | 533.1   | 63.99        | C-Ti-(OH) <sub>x</sub> |
|        | 534.8   | 14.05        | H <sub>2</sub> O       |

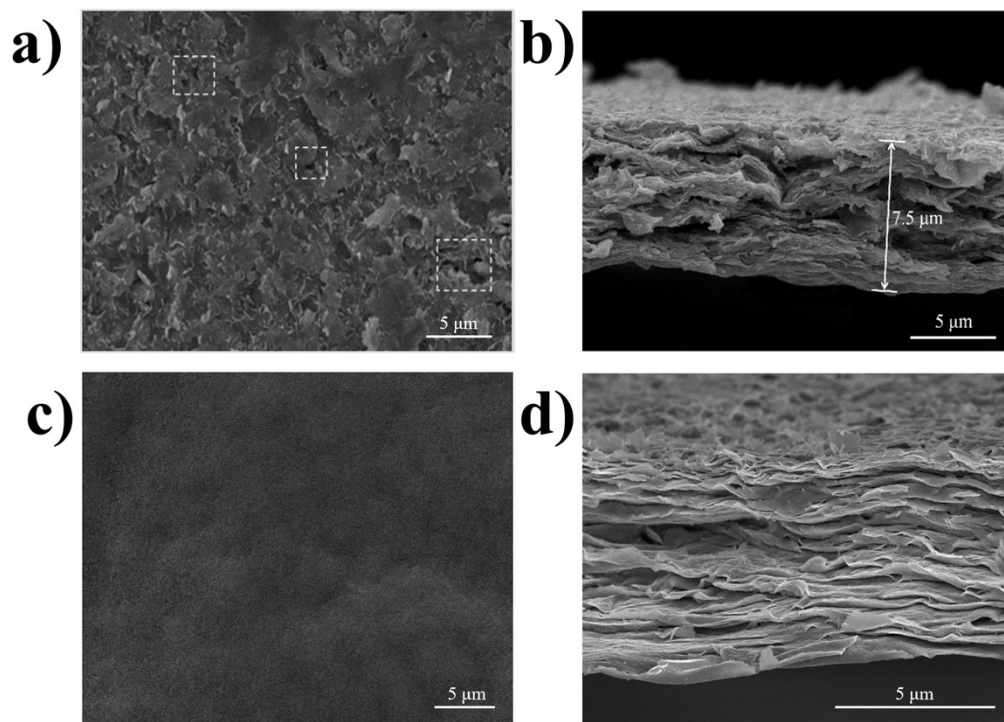

Fig. S8 The SEM images of filtered M-MXene film and D-MXene film. a) Surface and b) Cross section morphologies of M-MXene film. c) Surface and d) Cross section morphologies of D-MXene film.

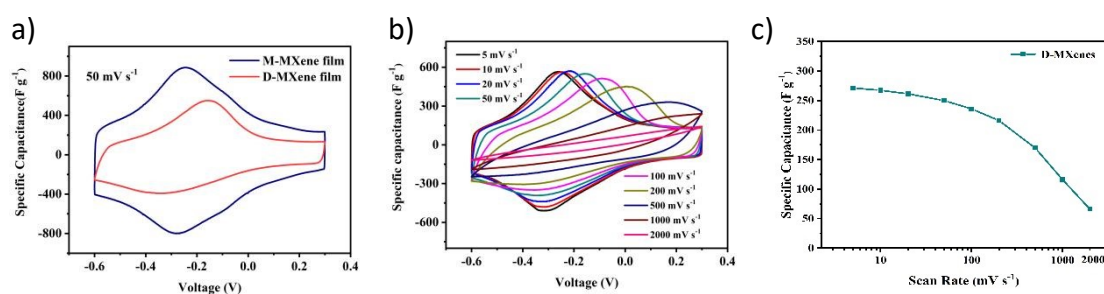

Fig. S9 a) Comparison of CV curves of M-MXene and D-MXene electrodes at 50 mV s<sup>-1</sup>; b) The CV curves of D-MXene electrode at different scan rates; c) The specific capacitance of D-MXenes at different scan rates.

Table S2 Comparison of the specific capacitance and rate performance.

| Number | Materials                                                      | Synthesis route                             | Electrolyte                        | Potential    | Capacitance                                         | Rate Capability                     | Ref  |
|--------|----------------------------------------------------------------|---------------------------------------------|------------------------------------|--------------|-----------------------------------------------------|-------------------------------------|------|
| 1      | 3D porous Ti <sub>3</sub> C <sub>2</sub> T <sub>x</sub> films  | freeze-casting assembly                     | 3 M H <sub>2</sub> SO <sub>4</sub> | -0.5~0.3 V   | 358.8 F g <sup>-1</sup><br>(20 mV s <sup>-1</sup> ) | 58.6%<br>(10 V s <sup>-1</sup> )    | [2]  |
| 2      | MXene hydrogel                                                 | metal ions induced gelation                 | 3 M H <sub>2</sub> SO <sub>4</sub> | -1.1~-0.15 V | 272 F g <sup>-1</sup><br>(2 mV s <sup>-1</sup> )    | 83.1%<br>(1 V s <sup>-1</sup> )     | [3]  |
| 3      | 3D Ti <sub>3</sub> C <sub>2</sub> T <sub>x</sub> /CNTs film    | in situ ice template strategy               | 3 M H <sub>2</sub> SO <sub>4</sub> | -0.7~0.3 V   | 375 F g <sup>-1</sup><br>(5 mV s <sup>-1</sup> )    | 67%<br>(1000 mV s <sup>-1</sup> )   | [4]  |
| 4      | Ti <sub>3</sub> C <sub>2</sub> T <sub>x</sub> -RGO film        | microscopic explosion of GO                 | 3 M H <sub>2</sub> SO <sub>4</sub> | -0.6~0.3V    | 505 F g <sup>-1</sup><br>(2 mV s <sup>-1</sup> )    | 69.9%<br>(100 mV s <sup>-1</sup> )  | [5]  |
| 5      | 3D Ti <sub>3</sub> C <sub>2</sub> T <sub>x</sub> aerogels      | thermal treatment at a mild temperature     | 3 M H <sub>2</sub> SO <sub>4</sub> | -0.6~0.2 V   | 438 F g <sup>-1</sup><br>(10 mV s <sup>-1</sup> )   | 79.7%<br>(2000 mV s <sup>-1</sup> ) | [6]  |
| 6      | Compact nanoporous MXene film                                  | freeze-drying and mechanically pressing     | 3 M H <sub>2</sub> SO <sub>4</sub> | -0.5~0.3V    | 345 F g <sup>-1</sup><br>(2 mV s <sup>-1</sup> )    | 50%<br>(500 mV s <sup>-1</sup> )    | [7]  |
| 7      | MXene-rGO                                                      | self-propagation                            | 3 M H <sub>2</sub> SO <sub>4</sub> | -0.6~0.2 V   | 329.2 F g <sup>-1</sup><br>(20 mV s <sup>-1</sup> ) | 78.8%<br>(1000 mV s <sup>-1</sup> ) | [8]  |
| 8      | 3D macroporous Ti <sub>3</sub> C <sub>2</sub> T <sub>x</sub>   | mild gelation                               | 3 M H <sub>2</sub> SO <sub>4</sub> | -0.6~0.25 V  | 349 F g <sup>-1</sup><br>(2 mV s <sup>-1</sup> )    | 57.9%<br>(2 V s <sup>-1</sup> )     | [9]  |
| 9      | MXene/rGO 3D porous aerogel                                    | dual utilization strategy of lignosulfonate | 3 M H <sub>2</sub> SO <sub>4</sub> | -0.55~0.2V   | 386 F g <sup>-1</sup><br>(2 mV s <sup>-1</sup> )    | 62.5%<br>(100 mV s <sup>-1</sup> )  | [10] |
| 10     | Macroporous Ti <sub>3</sub> C <sub>2</sub> T <sub>x</sub> film | PMMA spheres sacrificial template           | 3 M H <sub>2</sub> SO <sub>4</sub> | -1.1~-0.1V   | 450 F g <sup>-1</sup><br>(10 mV s <sup>-1</sup> )   | 46.7%<br>(10 V s <sup>-1</sup> )    | [11] |
| 11     | Porous Ti <sub>3</sub> C <sub>2</sub> T <sub>x</sub> film      | H <sub>2</sub> SO <sub>4</sub> oxidation    | 3 M H <sub>2</sub> SO <sub>4</sub> | -1.2~-0.2V   | 324 F g <sup>-1</sup><br>(5mV s <sup>-1</sup> )     | 64%<br>(10 V s <sup>-1</sup> )      | [12] |

|    |                                                                                     |                                                                         |                                                 |             |                                                   |                                     |      |
|----|-------------------------------------------------------------------------------------|-------------------------------------------------------------------------|-------------------------------------------------|-------------|---------------------------------------------------|-------------------------------------|------|
| 12 | 3D porous MXene/graphene                                                            | in situ sacrificial metallic zinc template                              | 3 M H <sub>2</sub> SO <sub>4</sub> + 50 mM LiBr | -0.6~-0.25V | 393 F g <sup>-1</sup><br>(2mV s <sup>-1</sup> )   | 32.7%<br>(10 V s <sup>-1</sup> )    | [13] |
| 13 | PANI/MXene film                                                                     | blade coating                                                           | 1 M H <sub>2</sub> SO <sub>4</sub>              | -0.2~-0.8V  | 560 F g <sup>-1</sup><br>(5mV s <sup>-1</sup> )   | 64%<br>(100 mV s <sup>-1</sup> )    | [14] |
| 14 | Ti <sub>3</sub> C <sub>2</sub> T <sub>x</sub> /Nb <sub>2</sub> CT <sub>x</sub> film | vacuum-assisted filtration                                              | 2 M H <sub>2</sub> SO                           | -0.8~-0.1 V | 370 F g <sup>-1</sup><br>(2 mV/s)                 | 56.1%<br>(200 mV s <sup>-1</sup> )  | [15] |
| 15 | N-Ti <sub>3</sub> C <sub>2</sub> T <sub>x</sub> film                                | electrostatic adsorption and calcination                                | 3 M H <sub>2</sub> SO <sub>4</sub>              | -1.1~-0.4V  | 415 F g <sup>-1</sup><br>(2 mV s <sup>-1</sup> )  | 75.9%<br>(200 mV s <sup>-1</sup> )  | [16] |
| 16 | MXene/rHGO                                                                          | filtration and annealing treatment                                      | 3 M H <sub>2</sub> SO <sub>4</sub>              | -0.7~0.3 V  | 438 F g <sup>-1</sup><br>(2 mV s <sup>-1</sup> )  | 69%<br>(500 mV s <sup>-1</sup> )    | [17] |
| 17 | MXene/graphene                                                                      | metallic zinc particles induced gelation                                | 3 M H <sub>2</sub> SO <sub>4</sub>              | -0.7~0.3 V  | 357 F g <sup>-1</sup><br>(10 mV s <sup>-1</sup> ) | 60%<br>(500 mV s <sup>-1</sup> )    | [18] |
| 18 | MXene/PANI                                                                          | self-assembly                                                           | 1 M H <sub>2</sub> SO <sub>4</sub>              | -0.65~0.2V  | 377 F g <sup>-1</sup><br>(2 mV s <sup>-1</sup> )  | 33%<br>(200 mV s <sup>-1</sup> )    | [19] |
| 19 | dodecaborate/MXene composites                                                       | electrostatic adsorption                                                | 1 M H <sub>2</sub> SO <sub>4</sub>              | -0.2~0.35V  | 366 F g <sup>-1</sup><br>(2 mV s <sup>-1</sup> )  | 58.2%<br>(200 mV s <sup>-1</sup> )  | [20] |
| 20 | MXene/rGO                                                                           | electrostatic self-assembly                                             | 3 M H <sub>2</sub> SO <sub>4</sub>              | -0.7~0.3 V  | 335 F g <sup>-1</sup><br>(2 mV s <sup>-1</sup> )  | 48.9%<br>(3000 mV s <sup>-1</sup> ) | [21] |
| 21 | Mesoporous gold/Ti <sub>3</sub> C <sub>2</sub> T <sub>x</sub> film                  | vacuum-assisted filtration                                              | 3 M H <sub>2</sub> SO <sub>4</sub>              | -0.8~-0.2 V | 268 F g <sup>-1</sup><br>(2 mV s <sup>-1</sup> )  | 81.3%<br>(20 mV s <sup>-1</sup> )   | [22] |
| 22 | 3D porous Ti <sub>3</sub> C <sub>2</sub> T <sub>x</sub> aerogel                     | H <sub>2</sub> O <sub>2</sub> oxidation, Zn reduction and freeze-drying | 3 M H <sub>2</sub> SO <sub>4</sub>              | -0.6~0.2 V  | 379 F g <sup>-1</sup><br>(2 mV s <sup>-1</sup> )  | 76.7%<br>(1 V s <sup>-1</sup> )     | [23] |
| 23 | MXene/C <sub>PAQ</sub>                                                              | vacuum-assisted filtration and calcination                              | 3 M H <sub>2</sub> SO <sub>4</sub>              | -0.6~0.3 V  | 556 F g <sup>-1</sup><br>(2 mV s <sup>-1</sup> )  | 49.4%<br>(1 V s <sup>-1</sup> )     | [24] |
| 24 | 3D porous Ti <sub>3</sub> C <sub>2</sub> T <sub>x</sub> aerogel                     | FeCl <sub>3</sub> oxidation and freeze-drying                           | 3 M H <sub>2</sub> SO <sub>4</sub>              | -1.0~-0.1 V | 304 F g <sup>-1</sup><br>(10 mV s <sup>-1</sup> ) | 79.0%<br>(1 V s <sup>-1</sup> )     | [25] |
| 25 | MXene/MHCS/CNT film                                                                 | vacuum-assisted filtration                                              | 3 M H <sub>2</sub> SO <sub>4</sub>              | -0.6~0.3 V  | 395 F g <sup>-1</sup><br>(2 mV s <sup>-1</sup> )  | 70.9%<br>(1 V s <sup>-1</sup> )     | [26] |
| 26 | 3D porous Ti <sub>3</sub> C <sub>2</sub> T <sub>x</sub>                             | zinc-assisted electrodeposition and freeze-drying                       | 3 M H <sub>2</sub> SO <sub>4</sub>              | -0.6~0.2 V  | 352 F g <sup>-1</sup><br>(2 mV s <sup>-1</sup> )  | 73.3%<br>(1 V s <sup>-1</sup> )     | [27] |

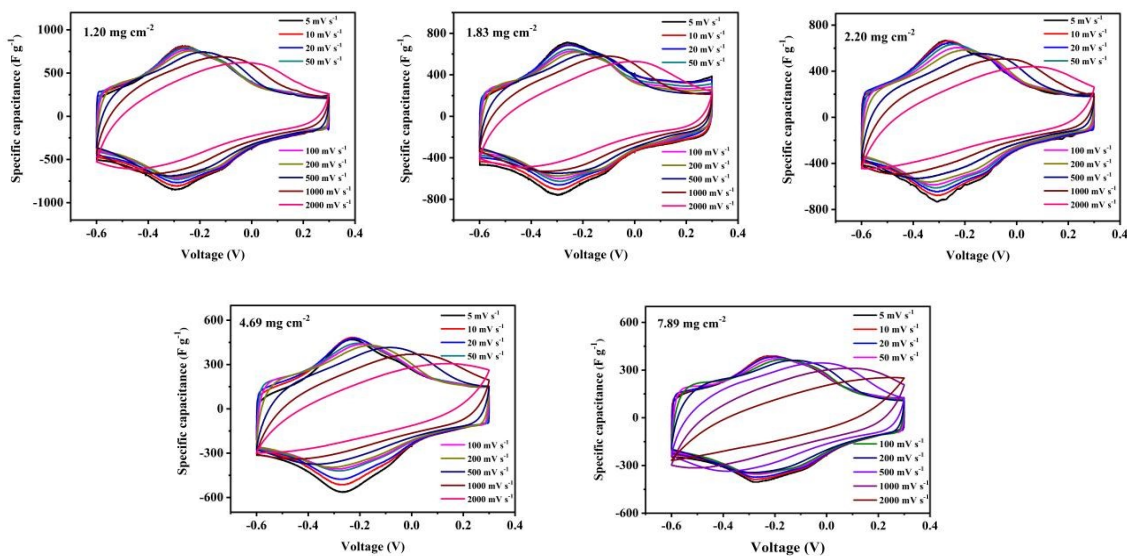

Fig. S10 The CV curves of M-MXene electrodes at different scan rates with different loading masses.

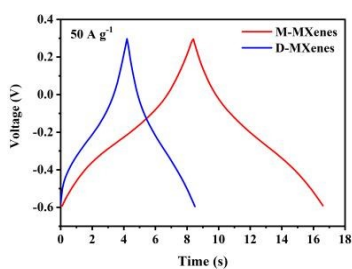

Fig. S11 The GCD curves of M-MXene and D-MXene electrodes at a current density of  $50 \text{ A g}^{-1}$ .

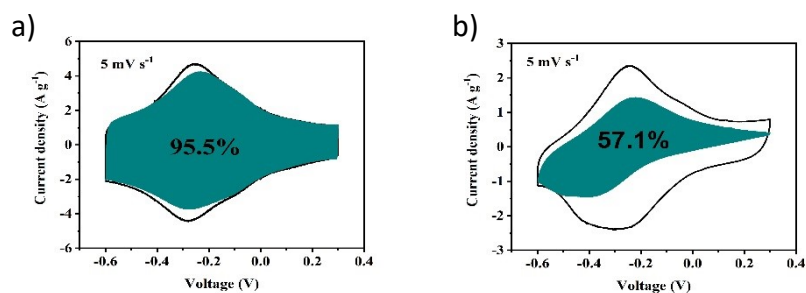

Fig. S12 The capacitive-controlled contribution for M-MXenes a) and D-MXenes b) at scan rate  $5 \text{ mV s}^{-1}$ .

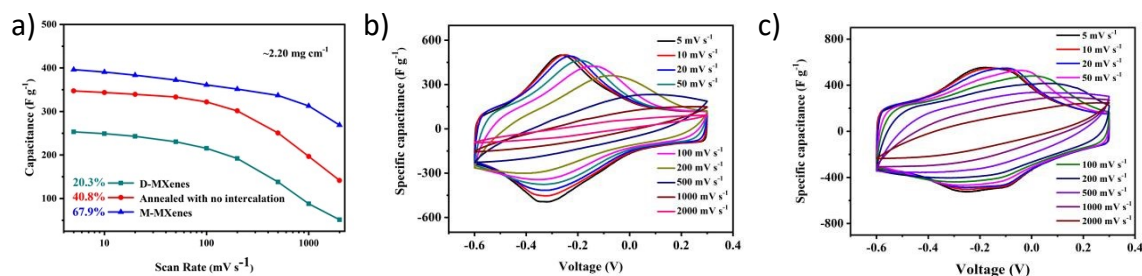

Fig. S13 Comparison of the D-MXenes, annealed MXenes with no intercalation and M-MXenes with a mass loading of  $\sim 2.20 \text{ mg cm}^{-2}$  at different scan rates; a) Their specific capacitance at different scan rates; b) CV curves of D-MXenes; c) CV curves of annealed MXenes with no intercalation.

## Reference

- 1 C. Zhou, D. Wang, F. Lagunas, B. Atterberry, M. Lei, H. Hu, Z. Zhou, A. S. Filatov, D. Jiang, A. J. Rossini, R. F. Klie and D. V. Talapin, *Nat. Chem.*, 2023, **15**, 1722-1729.
- 2 J. Kong, H. Yang, X. Guo, S. Yang, Z. Huang, X. Lu, Z. Bo, J. Yan, K. Cen, and K. K. Ostrikov, *ACS Energy Lett.*, 2020, **5**, 2266-2274.
- 3 Y. Deng, T. Shang, Z. Wu, Y. Tao, C. Luo, J. Liang, D. Han, R. Lyu, C. Qi, W. Lv, F. Kang and Q. H. Yang, *Adv. Mater.*, 2019, **31**, 1902432.
- 4 P. Zhang, Q. Zhu, R. A. Soomro, S. He, N. Sun, N. Qiao, and B. Xu, *Adv. Funct. Mater.*, 2020, **30**, 2000922.
- 5 Y. Fang, B. Yang, D. He, H. Li, K. Zhu, L. Wu, K. Ye, K. Cheng, J. Yan, G. Wang and D. Cao, *Chin. Chem. Lett.*, 2020, **31**, 1004-1008.
- 6 X. Wang, Q. Fu, J. Wen, X. Ma, C. Zhu, X. Zhang, and D. Qi, *Nanoscale*, 2018, **10**, 20828-20835.
- 7 Z. Fan, J. Wang, H. Kang, Y. Wang, Z. Xie, Z. Cheng, and Y. Liu, *ACS Appl. Energy Mater.*, 2020, **3**, 1811-1820.
- 8 J. Miao, Q. Zhu, K. Li, P. Zhang, Q. Zhao, and B. Xu, *J. Energy Chem.*, 2021, **52**, 243-250.
- 9 X. Yang, Y. Yao, Q. Wang, K. Zhu, K. Ye, G. Wang, D. Cao and J. Yan, *Adv. Funct. Mater.*, 2022, **32**, 2109479.
- 10 L. Ma, T. Zhao, F. Xu, T. You, and X. Zhang, *Chem. Eng. J.*, 2021, **405**, 126694.
- 11 M. R. Lukatskaya, S. Kota, Z. Lin, M.-Q. Zhao, N. Shpigel, M. D. Levi, J. Halim, P.-L. Taberna, M. W. Barsoum, P. Simon and Y. Gogotsi, *Nat. Energy*, 2017, **2**, 17105.
- 12 J. Tang, T. Mathis, X. Zhong, X. Xiao, H. Wang, M. Anayee, F. Pan, B. Xu and Y. Gogotsi, *Adv. Energy Mater.*, 2021, **11**, 2003025.
- 13 X. Yang, Q. Wang, K. Zhu, K. Ye, G. Wang, D. Cao, and J. Yan, *Adv. Funct. Mater.*, 2021, **31**, 2101087.
- 14 Y. Wang, X. Wang, X. Li, Y. Bai, H. Xiao, Y. Liu, and G. Yuan, *Chem. Eng. J.* 2021, **405**, 126664.
- 15 Z. Li, Y. Dall'Agnesse, J. Guo, H. Huang, X. Liang, and S. Xu, *J. Mater. Chem. A*, 2020, **8**, 16649-16660.
- 16 Y. Tian, W. Que, Y. Luo, C. Yang, X. Yin, and L. B. Kong, *J. Mater. Chem. A*, 2019, **7**, 5416-5425.
- 17 Z. Fan, Y. Wang, Z. Xie, D. Wang, Y. Yuan, H. Kang, B. Su, Z. Cheng and Y. Liu, *Adv. Sci.*, 2018, **5**, 1800750.
- 18 A. Sikdar, P. Dutta, S. K. Deb, A. Majumdar, N. Padma, S. Ghosh, and U. N. Maiti, *Electrochimica Acta*, 2021, **391**, 138959.
- 19 X. Wang, Y. Wang, D. Liu, X. Li, H. Xiao, Y. Ma, M. Xu, G. Yuan and G. Chen, *ACS Appl. Mater. Interfaces*, 2021, **13**, 30633-30642.
- 20 Z. Li, C. Ma, Y. Wen, Wei, Z. X. Xing, J. Chu, C. Yu, K. Wang and Z. K. Wang, *Nano Res.*, 2020, **13**, 196-202.
- 21 J. Yan, C. E. Ren, K. Maleski, C. B. Hatter, B. Anasori, P. Urbankowski, A. Sarycheva and Y. Gogotsi, *Adv. Funct. Mater.*, 2017, **27**, 1701264.
- 22 Y. Luo, W. Que, A. S. Nugraha, Y. Kang, Y. Tang, Z. Wu, J. Henzie, and Y. Yamauchi, *J. Mater. Chem. A*, 2025, **13**, 1330-1342.
- 23 P. Ji, L. Liu, Y. Deng, Y. Luo, Y. Cao, B. Li, K. Wu, X. Dong, Z. Liu and Y. Tai, *J. Energy Storage*, 2024, **93**, 112194.
- 24 R. Ma, L. Cao, J. Zhuo, J. Lu, J. Chen, J. Huang, G. Yang and F. Yi, *Adv. Energy Mater.*, 2023, **13**, 2301219.
- 25 W. Yan, S. Yan, D. Cai, Z. Tian, L. Guo, and Y. Wang, *Electrochimica Acta*, 2025, **532**, 146479.
- 26 F. Yang, K. Lv, X. Zhao, D. Kong, N. Kong, Z. Luo, J. Tao, J. Zhou, J. M. Razal and J. Zhang, *Chem. Eng. J.*, 2024, **494**, 153246.
- 27 P. Ji, W. Chen, Y. Luo, Y. Wang, N. Gu, G. Meng, J. Wu, B. Li, K. Wu and Z. Liu, *J. Alloy. Compd.*, 2024, **997**, 174426.
